# Supplementary material
Source: publisher figshare collection journal article supplement (https://acs.figshare.com/ndownloader/files/17513591)
Supplement: Supplementary file 1 [file 17513591]

## Supporting Information

### **Exploring Metal-Support Interactions to Immobilize Sub-nm Co Clusters on $\gamma$ -Mo<sub>2</sub>N: A Highly Selective and Stable Catalyst for CO<sub>2</sub> Activation.**

Siyu Yao<sup>‡1</sup>, Lili Lin<sup>‡1,2</sup>, Wenjie Liao<sup>3</sup>, Ning Rui<sup>1</sup>, Na Li<sup>4</sup>, Zongyuan Liu<sup>1</sup>, Jiajie Cen<sup>5</sup>, Feng Zhang<sup>5</sup>, Xing Li<sup>4</sup>, Liang Song<sup>5</sup>, Luis Betancourt De Leon<sup>1</sup>, Dong Su<sup>4</sup>, Sanjaya D. Senanayake<sup>1</sup>, Ping Liu<sup>1</sup>, Ding Ma<sup>2\*</sup>, Jingguang G. Chen<sup>1,6\*</sup>, Jose A. Rodriguez<sup>1,5\*</sup>

\* rodriguez@bnl.gov \* jgchen@columbia.edu \* dma@pku.edu.cn

<sup>1</sup> Chemistry Department, Brookhaven National Laboratory, Upton, New York 11973, United States

<sup>2</sup> College of Chemistry and Molecular Engineering, Peking University, Beijing 100871, China

<sup>3</sup> Department of Chemistry, State University of New York at Stony Brook, New York 11794, United States

<sup>4</sup> Center for Functional Nanomaterials, Brookhaven National Laboratory, Upton, New York 11973, United States

<sup>5</sup> Materials Science and Chemical Engineering Department, State University of New York at Stony Brook, New York, 11794, United States

<sup>6</sup> Department of Chemical Engineering, Columbia University, New York, NY 10027, United States

## Figures and Tables

**Table S1.** Physical properties of Co/ $\gamma$ -Mo<sub>2</sub>N catalysts

| Catalysts                          | BET surface area (m <sup>2</sup> /g) | Cobalt loading (wt%) |
|------------------------------------|--------------------------------------|----------------------|
| $\gamma$ -Mo <sub>2</sub> N        | 52                                   | -                    |
| 1% Co/ $\gamma$ -Mo <sub>2</sub> N | 48                                   | 1.35                 |
| 2% Co/ $\gamma$ -Mo <sub>2</sub> N | 42                                   | 1.96                 |
| 5% Co/ $\gamma$ -Mo <sub>2</sub> N | 40                                   | 4.80                 |
| 2% Co/ZrO <sub>2</sub>             | 87                                   | 2.12                 |
| 2% Co/CeO <sub>2</sub>             | 41                                   | 1.98                 |

## X-ray powder diffraction

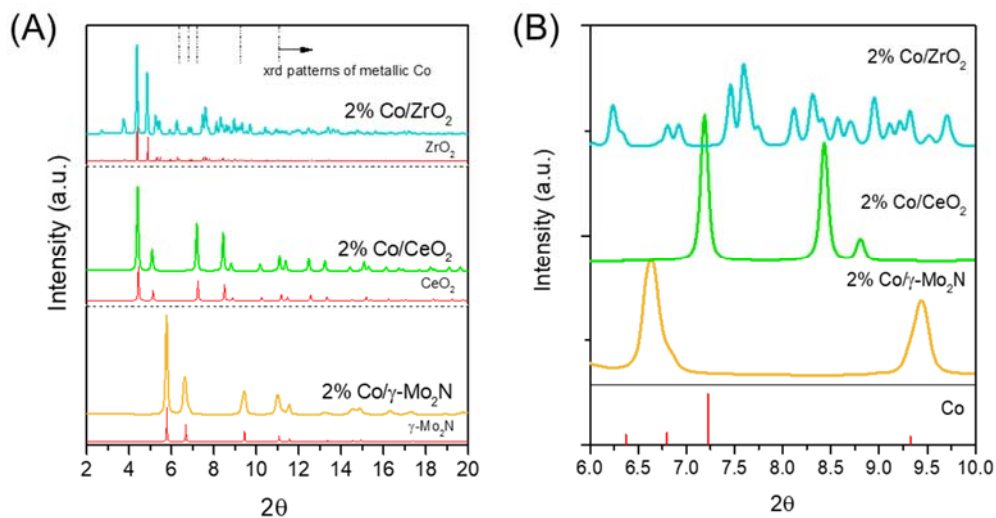

**Figure S1.** The powder diffraction patterns of (A) the Co/ $\gamma$ -Mo<sub>2</sub>N and Co/CeO<sub>2</sub>, Co/ZrO<sub>2</sub> reference catalysts. The diffraction pattern of Co is shown in the bottom of the figures. (B) The enlarged profiles of Figure (A) from 6.0 to 10.0 °.

## Scanning transmission electron microscopy

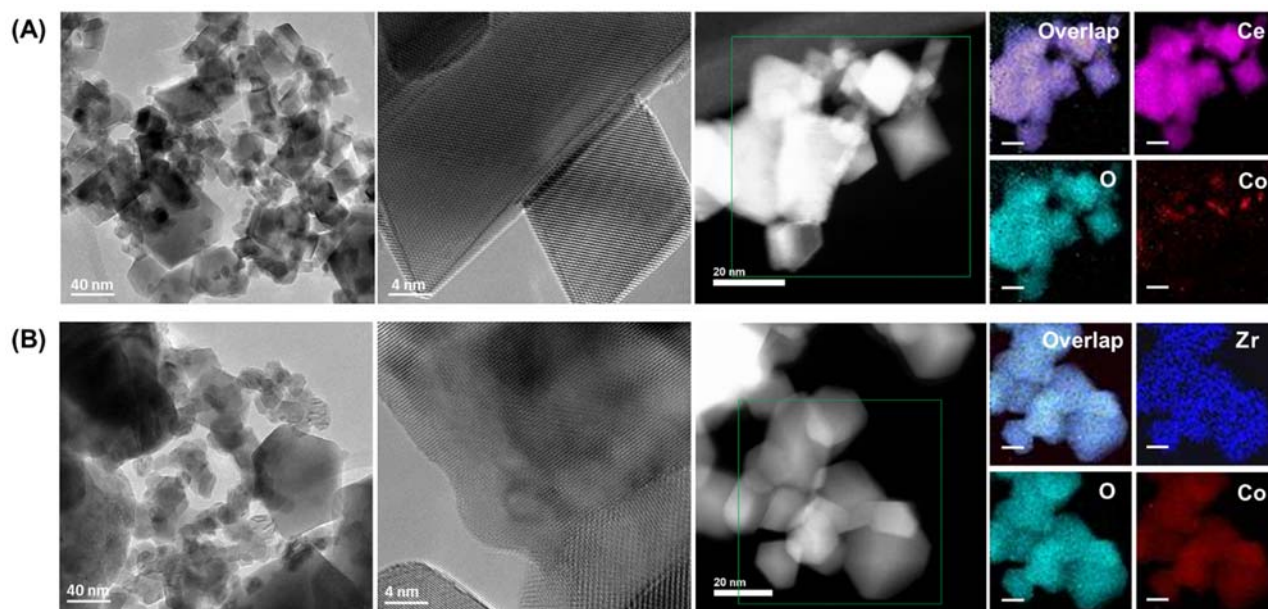

**Figure S2. TEM and STEM images of the reference catalysts.** (A) 2% Co/CeO<sub>2</sub> and (B) 2% Co/ZrO<sub>2</sub>. The scale bar in the EELS mapping equals 10 nm.

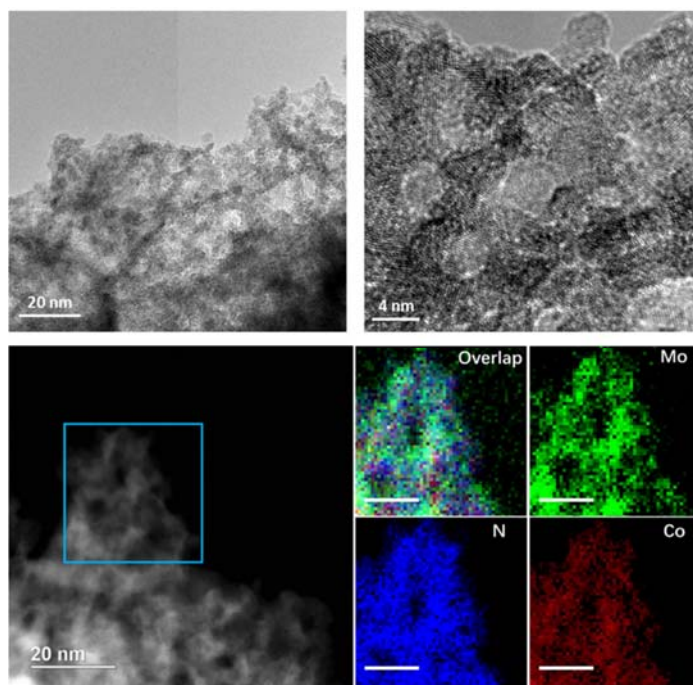

**Figure S3. TEM and STEM images and element mapping of the 5% Co/γ-Mo<sub>2</sub>N catalyst.** The scale bar in the EELS mapping equals 10 nm.

## X-ray Absorption Fine Structure Spectroscopy

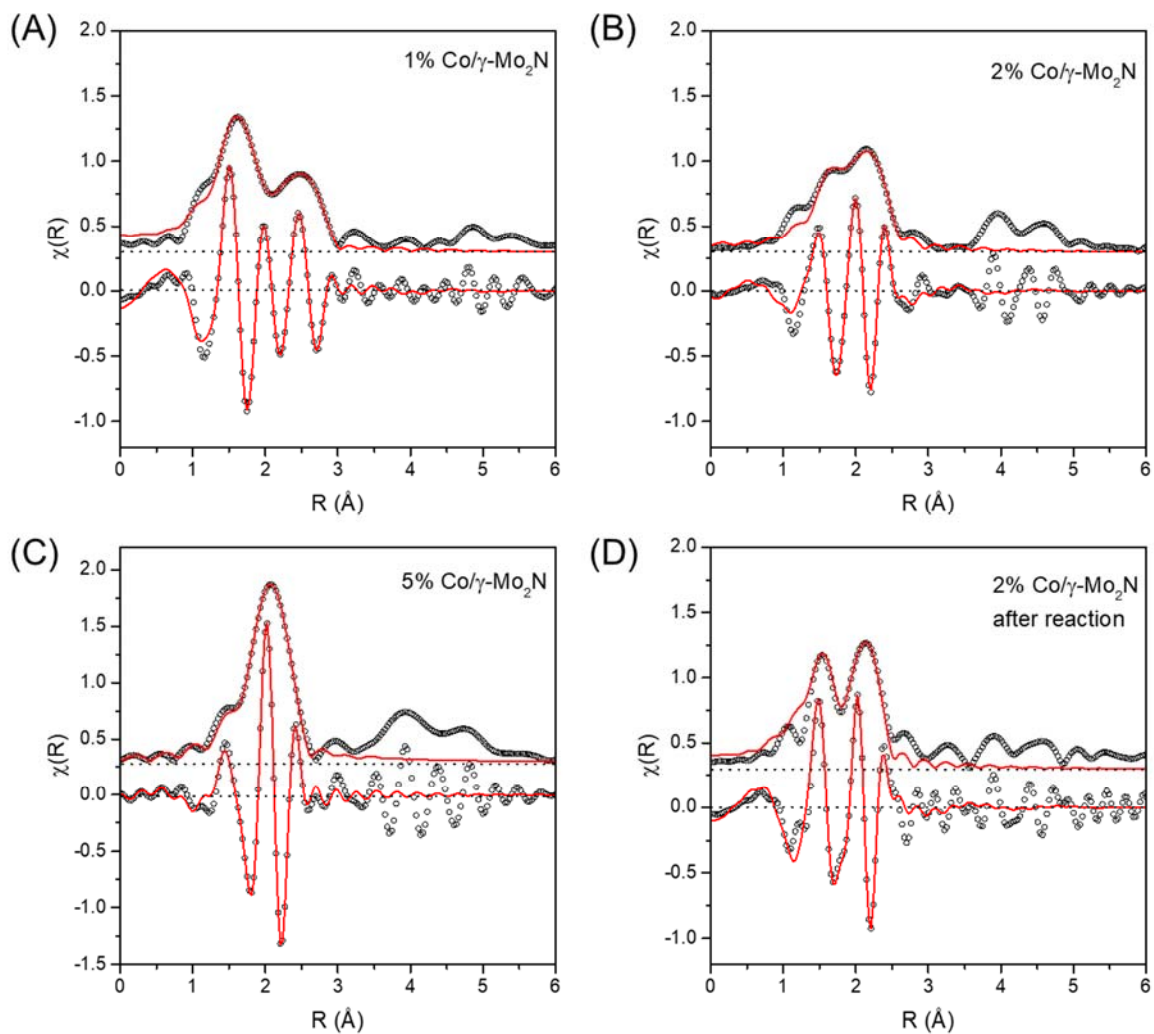

**Figure S4. Co K edge EXAFS fitting plots of the tested catalysts in R space. (A) 1% Co/ $\gamma$ -Mo<sub>2</sub>N (B) 2% Co/ $\gamma$ -Mo<sub>2</sub>N; (C) 5% Co/ $\gamma$ -Mo<sub>2</sub>N after reduction; and (D) 2% Co/ $\gamma$ -Mo<sub>2</sub>N after reaction**

**Table S2.** Co K edge EXAFS fitting results of Co/ $\gamma$ -Mo<sub>2</sub>N catalysts

| Entry | Sample                                            | Shell | Bond length (Å) | Coordination Number | $\sigma^2$ (Å <sup>2</sup> ) | E <sub>0</sub> shift (eV) |
|-------|---------------------------------------------------|-------|-----------------|---------------------|------------------------------|---------------------------|
| 1     | 1% Co/ $\gamma$ -Mo <sub>2</sub> N                | Co-N  | 2.02±0.01       | 2.5±0.2             | 0.003±0.001                  | 2.9                       |
|       |                                                   | Co-Co | 2.51±0.01       | 2.4±0.2             | 0.006±0.001                  | 3.0                       |
|       |                                                   | Co-Mo | 2.86±0.01       | 1.3±0.4             | 0.004±0.001                  | 2.4                       |
| 2     | 2% Co/ $\gamma$ -Mo <sub>2</sub> N                | Co-N  | 2.02±0.02       | 1.6±0.2             | 0.004±0.002                  | 8.0                       |
|       |                                                   | Co-Co | 2.50±0.01       | 2.9±0.5             | 0.007±0.001                  | 0.7                       |
| 3     | 5% Co/ $\gamma$ -Mo <sub>2</sub> N                | Co-N  | 2.02±0.02       | 1.2±0.5             | 0.006±0.002                  | 5.7                       |
|       |                                                   | Co-Co | 2.49±0.01       | 4.1±0.5             | 0.005±0.001                  | -5.6                      |
| 4     | 2% Co/ $\gamma$ -Mo <sub>2</sub> N after reaction | Co-N  | 1.96±0.02       | 1.6±0.4             | 0.003±0.001                  | -5.2                      |
|       |                                                   | Co-Co | 2.48±0.01       | 2.4±0.8             | 0.004±0.001                  | -2.9                      |
| 5     | 2% Co/CeO <sub>2</sub> reduced                    | Co-Co | 2.49±0.02       | 8.4±0.8             | 0.006±0.002                  | -1.1                      |
| 6     | 2% Co/ZrO <sub>2</sub> reduced                    | Co-Co | 2.50±0.01       | 9.1±0.5             | 0.005±0.002                  | 1.4                       |

**Table S3.** The comparison of the EXAFS fitting results of the 1% Co/ $\gamma$ -Mo<sub>2</sub>N using Co-Mo or Co-O-Co paths

| Sample                             | Shell     | Bond length (Å) | Coordination Number | $\sigma^2$ (Å <sup>2</sup> ) | E <sub>0</sub> shift (eV) |
|------------------------------------|-----------|-----------------|---------------------|------------------------------|---------------------------|
| 1% Co/ $\gamma$ -Mo <sub>2</sub> N | Co-N      | 2.02±0.01       | 2.5±0.2             | 0.003                        | 3.2                       |
|                                    | Co-Co     | 2.51±0.01       | 2.4±0.2             | 0.006                        |                           |
|                                    | (Co-Mo)   | 2.86±0.01       | 1.3±0.4             | 0.004                        |                           |
| 1% Co/ $\gamma$ -Mo <sub>2</sub> N | Co-N      | 2.03±0.01       | 2.4±0.2             | 0.003                        | 5.3                       |
|                                    | Co-Co     | 2.53±0.01       | 3.4±0.4             | 0.006                        |                           |
|                                    | (Co-O-Co) | 3.03±0.02       | 0.5±0.5             | -0.002                       |                           |

The meaningless fitting parameters were marked in red

The fitting results demonstrate that the Co-O-Co fitting attempt is not reasonable as the  $\sigma^2$  value is negative and the correspondent C.N. exhibits extremely large fitting error.

### Determine the size of the Co clusters based on the EXAFS fitting results

**Table S4.** The relationship of cluster size and average coordination number of the first nearest neighbor.<sup>1-3</sup>

| Clusters/Particles | Size (nm) | Average theoretical 1 <sup>st</sup> Coordination number |
|--------------------|-----------|---------------------------------------------------------|
| M <sub>1</sub>     | 0.25      | 0                                                       |
| M <sub>3</sub>     | 0.6       | 2                                                       |
| M <sub>4</sub>     | 0.6       | 3                                                       |
| M <sub>10</sub>    | 0.8       | 5.1                                                     |
| M <sub>38</sub>    | 1.3       | 6.3                                                     |
| M <sub>66</sub>    | 1.8       | 7.4                                                     |
| M <sub>138</sub>   | 2.2       | 8.4                                                     |
| M <sub>243</sub>   | 2.7       | 9.0                                                     |
| M <sub>303</sub>   | 2.9       | 9.3                                                     |
| M <sub>476</sub>   | 3.3       | 9.6                                                     |

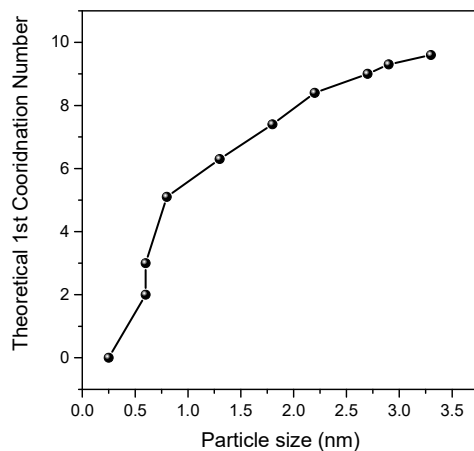

Based on the relationship of theoretical 1<sup>st</sup> shell coordination number with the increasing half-sphere particle size, it could be seen that at the small particle size region, the coordination number is very sensitive to the particle size change.

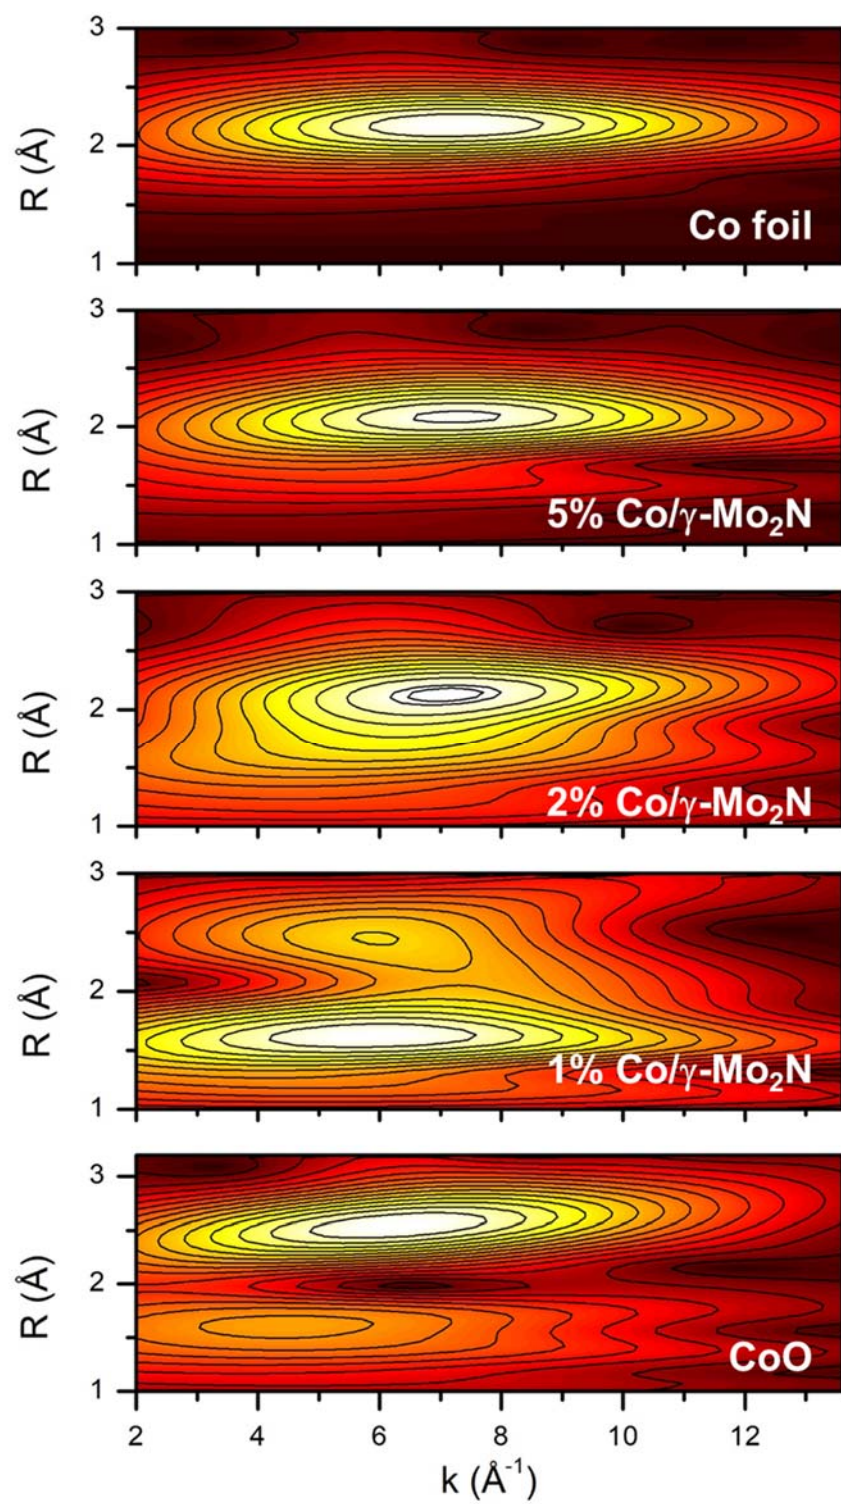

Figure S5. Wavelet Transformation (WT) spectra of activated Co/γ-Mo<sub>2</sub>N catalysts.



## Justification for the EXAFS fitting (Taking 1% Co/ $\gamma$ -Mo<sub>2</sub>N as an example)

The fitting quality of each Co spectra could be seen from the Figure S3. To justify the choice of the structure models, especially the use of Co-Mo rather than Co-O-Co (Co-N-Co) shell in the 1% Co/ $\gamma$ -Mo<sub>2</sub>N sample, the following information is listed.

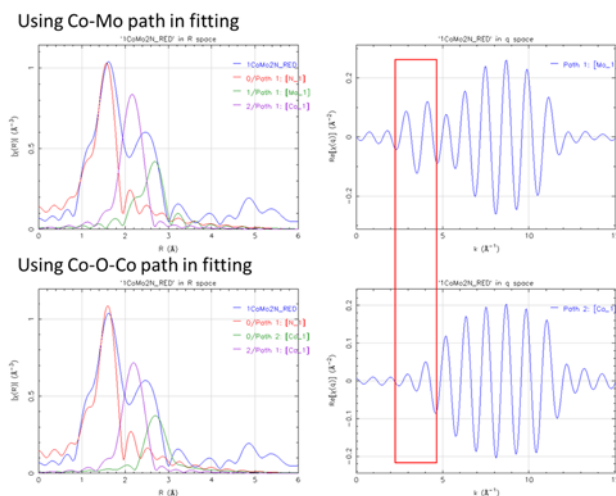

**Figure S6.** The comparison of the EXAFS fittings of the in R space and q-real space using Co-Mo or Co-O-Co paths.

Only based on the R space spectra, the choice of Co-Mo or Co-O-Co both seems OK. However, it could be noticed that the oscillation of Co-Mo path in the q space shows a local maximum which is absent in the Co-O-Co sample. Therefore, we further analysis the wavelet transformation spectra.

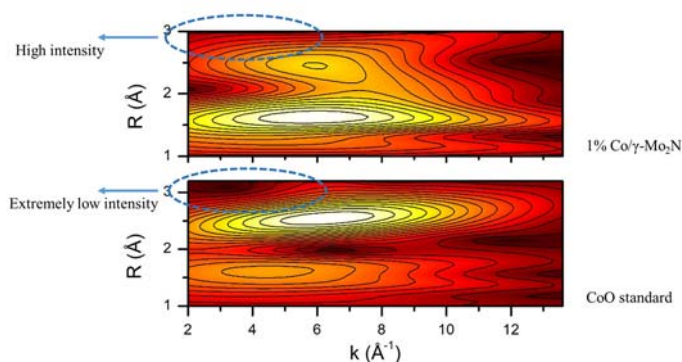

**Figure S7.** The comparison of the low k part of the WT diagram of the 1% Co/ $\gamma$ -Mo<sub>2</sub>N and CoO standard. The blue circles show the evidence that the Co-O-Co path should not be included in the EXAFS fitting.

Based on the figures, it is clearly that the 1% Co/ $\gamma$ -Mo<sub>2</sub>N shows considerable intensity in the region of the blue circle, which is different from CoO standard. Therefore, we confirm that the high R component should probably be Co-Mo. The fitting results of the R space spectra will further confirm this conclusion.



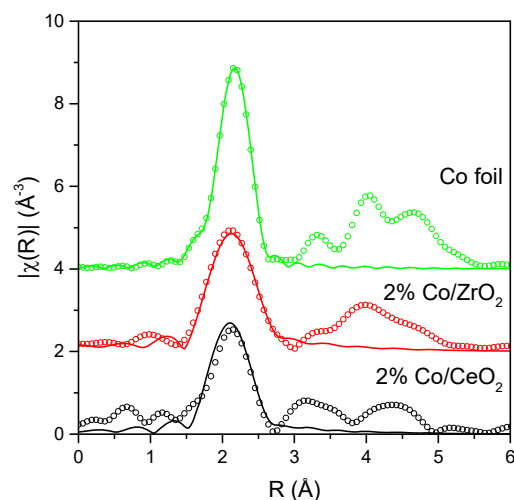

**Figure S8.** Co K edge EXAFS fitting plots of the reference catalysts in R space.

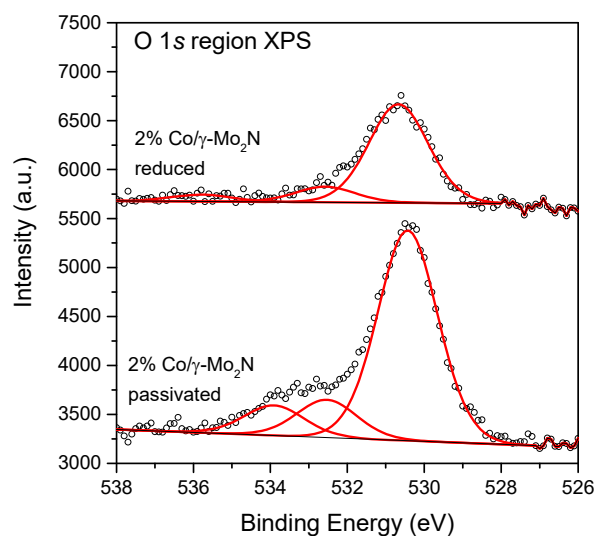

**Figure S9.** The O 1s XPS spectra of the 2% Co/ $\gamma$ -Mo<sub>2</sub>N. (A) passivated sample and (B) reduced sample in the AP-XPS chamber (~60% of the oxygen signal was removed). The reduction of the sample was done at 500 °C using only 15 mTorr of H<sub>2</sub>. A larger reduction is expected upon exposure of the sample to H<sub>2</sub>-rich streams at higher temperatures.

**Table S5.** The peak affiliation of the AP-XPS spectra

| Binding Energy (eV)                                                                      | Species    |
|------------------------------------------------------------------------------------------|------------|
| <b>Mo 3d region (The 3d<sub>5/2</sub> and 3d<sub>3/2</sub> split energy is 3.13 eV)</b>  |            |
| 228.50                                                                                   | Mo nitride |
| 229.23                                                                                   | Mo (IV)    |
| 230.44                                                                                   | Mo (V)     |
| 232.25                                                                                   | Mo (VI)    |
| <b>Mo 3p region (The 3p<sub>3/2</sub> and 3p<sub>1/2</sub> split energy is 17.55 eV)</b> |            |
| 394.85                                                                                   | Mo nitride |
| 396.65                                                                                   | Mo (IV)    |
| 398.85                                                                                   | Mo(VI)     |
| <b>N 1s region</b>                                                                       |            |
| 397.80 eV                                                                                | Nitride N  |

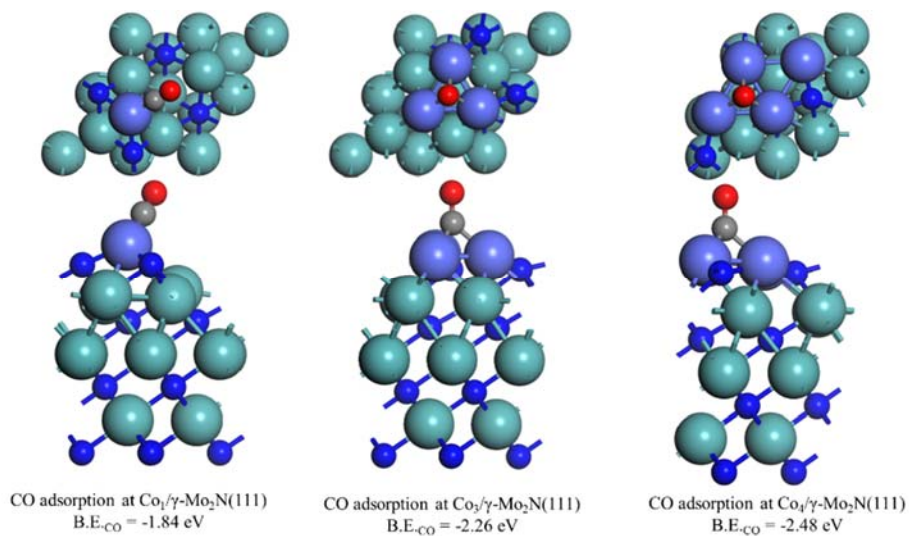

**Figure S10.** The calculation of the adsorption energy of CO on the Co<sub>1</sub>, Co<sub>3</sub> and Co<sub>4</sub>/γ-Mo<sub>2</sub>N(111) model surfaces.

## References

1. Beale, A. M.; Weckhuysen, B. M., *EXAFS as a tool to interrogate the size and shape of mono and bimetallic catalyst nanoparticles*. *Phys. Chem. Chem. Phys.* **2010**, *12*, 5562-5574.
2. Green, A. E.; Justen, J.; Schollkopf, W.; Gentleman, A. S.; Fielicke, A.; Mackenzie, S. R., *IR Signature of Size-Selective CO<sub>2</sub> Activation on Small Platinum Cluster Anions, Ptn<sup>-</sup> (n=4-7)*. *Angew. Chem. Int. Ed. Engl.* **2018**, *57*, 14822-14826.
3. Kibata, T.; Mitsudome, T.; Mizugaki, T.; Jitsukawa, K.; Kaneda, K., *Investigation of size-dependent properties of sub-nanometer palladium clusters encapsulated within a polyamine dendrimer*. *Chem Commun* **2013**, *49*, 167-169.
